# Supplementary material for: Frequency and mortality of sepsis and septic shock in China: a systematic review and meta-analysis
Source: Springer Nature journal article supplement (doi:10.1186/s12879-022-07543-8), 2022-06-21

**Additional file 1: Meta-regression and Additional figures.**

**Meta-regression**

**1. Sepsis mortality**

|                                                |               |   |         |
|------------------------------------------------|---------------|---|---------|
| Meta-regression                                | Number of obs | = | 14      |
| REML estimate of between-study variance        | tau2          | = | .0113   |
| % residual variation due to heterogeneity      | I-squared_res | = | 91.99%  |
| Proportion of between-study variance explained | Adj R-squared | = | -61.65% |
| Joint test for all covariates                  | Model F(5,8)  | = | 0.13    |
| With Knapp-Hartung modification                | Prob > F      | = | 0.9825  |

|                | _ES       | Coef.    | Std. Err. | t     | P> t       | [95% Conf. Interval] |  |
|----------------|-----------|----------|-----------|-------|------------|----------------------|--|
| Definition     | .019325   | .0350875 | 0.55      | 0.597 | -0.0615869 | .1002369             |  |
| Study design   | .0098267  | .0719412 | 0.14      | 0.895 | -.15607    | .1757235             |  |
| Study location | -.0290154 | .0558661 | -0.52     | 0.618 | -.1578428  | .099812              |  |
| Endpoints      | .0310449  | .0814382 | 0.38      | 0.713 | -.156752   | .2188418             |  |
| Study centers  | -.0185944 | .0701453 | -0.27     | 0.798 | -.1803497  | .1431608             |  |
| _cons          | .2844725  | .2191471 | 1.30      | 0.230 | -.2208817  | .7898267             |  |

**2. Septic shock mortality**

|                                                |               |   |        |
|------------------------------------------------|---------------|---|--------|
| Meta-regression                                | Number of obs | = | 10     |
| REML estimate of between-study variance        | tau2          | = | .01358 |
| % residual variation due to heterogeneity      | I-squared_res | = | 87.42% |
| Proportion of between-study variance explained | Adj R-squared | = | 24.45% |
| Joint test for all covariates                  | Model F(4,5)  | = | 1.53   |
| With Knapp-Hartung modification                | Prob > F      | = | 0.3220 |

|                | _ES       | Coef.    | Std. Err. | t     | P> t      | [95% Conf. Interval] |  |
|----------------|-----------|----------|-----------|-------|-----------|----------------------|--|
| Definition     | .0245329  | .1276626 | 0.19      | 0.855 | -.3036343 | .3527                |  |
| Study design   | -.2249434 | .1081076 | -2.08     | 0.092 | -.5028429 | .052956              |  |
| Study location | -.0291704 | .1532626 | -0.19     | 0.857 | -.4231445 | .3648036             |  |
| Study centers  | .0133103  | .1025027 | 0.13      | 0.902 | -.2501813 | .2768019             |  |
| _cons          | .7553199  | .3030357 | 2.49      | 0.055 | -.0236582 | 1.534298             |  |

**Figure S1**

|              |  | Risk of bias domains |    |    |    |    |    |    |         |
|--------------|--|----------------------|----|----|----|----|----|----|---------|
|              |  | D1                   | D2 | D3 | D4 | D5 | D6 | D7 | Overall |
| Chen 2009    |  | -                    | X  | ?  | ?  | -  | +  | X  | X       |
| Wang 2014    |  | +                    | X  | ?  | ?  | +  | +  | -  | -       |
| Yin 2014     |  | +                    | -  | ?  | ?  | +  | -  | -  | -       |
| Cheng 2017b  |  | +                    | X  | ?  | ?  | +  | -  | +  | -       |
| Huang 2018   |  | !                    | X  | ?  | ?  | -  | -  | -  | X       |
| Zhou 2018    |  | X                    | X  | ?  | ?  | +  | +  | -  | -       |
| Zhang Z 2019 |  | +                    | +  | ?  | ?  | +  | +  | -  | +       |
| Xing 2019    |  | -                    | +  | +  | -  | +  | +  | -  | +       |
| Dong 2020    |  | +                    | +  | ?  | ?  | +  | +  | +  | +       |
| Xie 2020     |  | +                    | +  | ?  | ?  | +  | +  | +  | +       |
| Jiang 2019   |  | +                    | -  | ?  | ?  | +  | +  | -  | -       |
| Zhang W 2019 |  | +                    | +  | ?  | ?  | +  | -  | -  | -       |
| Zhao 2020    |  | X                    | !  | ?  | ?  | -  | -  | X  | X       |
| Cheng 2017a  |  | +                    | +  | ?  | ?  | +  | +  | +  | +       |
| Yang 2007    |  | -                    | -  | ?  | +  | +  | +  | -  | -       |
| Li 2013      |  | -                    | +  | ?  | ?  | -  | +  | -  | +       |
| Wu 2013      |  | +                    | -  | +  | -  | +  | +  | -  | +       |
| Zhou 2014    |  | +                    | +  | ?  | ?  | -  | +  | -  | -       |
| Wu 2015      |  | !                    | X  | -  | ?  | X  | -  | X  | X       |
| Lu 2016      |  | X                    | X  | ?  | ?  | -  | -  | !  | X       |
| Xue 2019     |  | -                    | X  | ?  | ?  | -  | -  | X  | -       |
| Xie 2008     |  | +                    | +  | ?  | ?  | +  | +  | -  | +       |
| Xu 2014      |  | -                    | +  | +  | +  | -  | +  | -  | +       |
| Luo 2015     |  | +                    | X  | -  | -  | -  | +  | X  | -       |
| Li 2016      |  | -                    | +  | +  | -  | +  | +  | -  | +       |
| Wang 2017    |  | X                    | -  | -  | -  | +  | +  | X  | -       |
| Yan 2017     |  | +                    | -  | ?  | ?  | -  | +  | -  | -       |
| Liu 2018     |  | +                    | +  | +  | +  | +  | +  | +  | +       |
| Liang 2019   |  | !                    | X  | ?  | ?  | -  | -  | X  | X       |

Study

Domains:  
 D1: Bias due to confounding.  
 D2: Bias due to selection of participants.  
 D3: Bias in classification of interventions.  
 D4: Bias due to deviations from intended interventions.  
 D5: Bias due to missing data.  
 D6: Bias in measurement of outcomes.  
 D7: Bias in selection of the reported result.

Judgement  
 Critical  
 Serious  
 Moderate  
 Low  
 No information

**Figure S2**

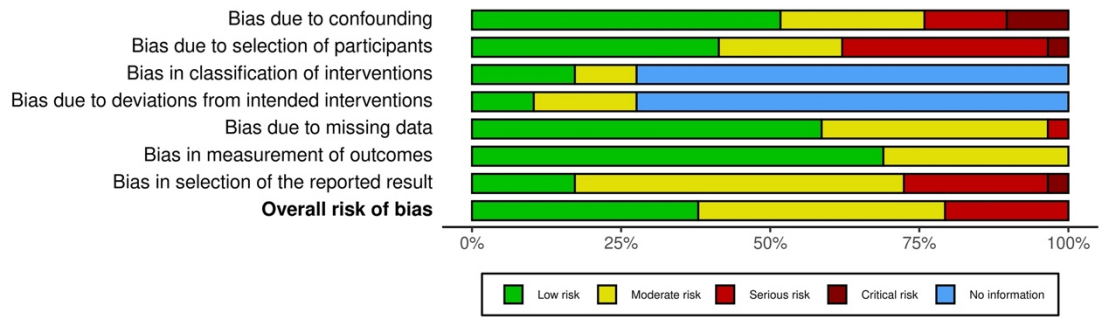

**Figure S3**

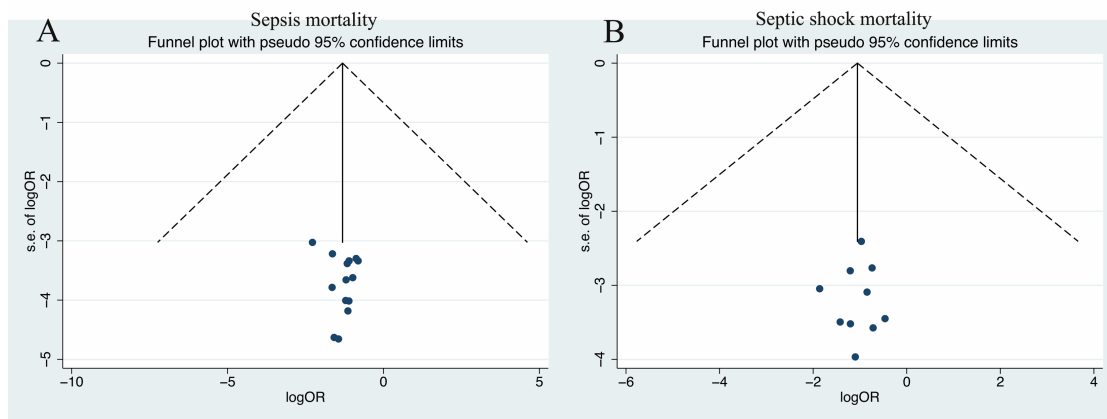

Supplement: MOESM1 [file 23188540]
